# Supplementary material for: Perinatal and Antibiotic Exposures and the Risk of Developing Childhood-Onset Inflammatory Bowel Disease: A Nested Case-Control Study Based on a Population-Based Birth Cohort
Source: PubMed Central journal article supplement (PMC7177699; doi:10.3390/ijerph17072409), 2020-04-02
Supplement: ijerph-17-02409-s001.pdf [file ijerph-17-02409-s001.pdf]

**Table S1** Perinatal risk factors and development of IBD in childhood, stratified by age at onset.

|                               | EO-IBD†                |                            |                               | P-IBD‡                  |                             |                               |
|-------------------------------|------------------------|----------------------------|-------------------------------|-------------------------|-----------------------------|-------------------------------|
| Characteristics               | Cases (n=62, n<br>(%)) | Controls (n=620), n<br>(%) | Fully adjusted OR<br>(95% CI) | Cases (n=102, n<br>(%)) | Controls (n=1020), n<br>(%) | Fully adjusted OR<br>(95% CI) |
| <b>Season of birth</b>        |                        |                            |                               |                         |                             |                               |
| <b>May-September</b>          | 31 (50.0)              | 279 (45.0)                 | 1.25 (0.74-2.12)              | 45 (44.1)               | 421 (41.3)                  | 1.16 (0.77-1.76)              |
| <b>October-April</b>          | 31(50.0)               | 341 (55.0)                 | 1                             | 57 (55.9)               | 599 (58.7)                  | 1                             |
| <b>Siblings</b>               |                        |                            |                               |                         |                             |                               |
| <b>No</b>                     | 36(58.1)               | 343 (55.3)                 | 1.14 (0.65-1.99)              | 62 (60.8)               | 535 (52.4)                  | 1.20 (0.76-1.90)              |
| <b>Yes</b>                    | 26 (41.9)              | 277 (46.7)                 | 1                             | 40 (39.2)               | 485 (47.6)                  | 1                             |
| <b>Multiple births</b>        |                        |                            |                               |                         |                             |                               |
| <b>1</b>                      | 61 (98.4)              | 610 (98.4)                 | 1                             | 98 (96.1)               | 997 (97.8)                  | 1                             |
| <b>≥2</b>                     | 1 (1.61)               | 10 (1.6)                   | 0.89 (0.09-9.19)              | 4 (3.9)                 | 23 (2.3)                    | 1.68 (0.49-5.76)              |
| <b>Birth weight</b>           |                        |                            |                               |                         |                             |                               |
| <b>≥2500</b>                  | 58(93.6)               | 590 (95.2)                 | 1                             | 96 (94.1)               | 973 (95.4)                  | 1                             |
| <b>&lt;2500</b>               | 4 (6.5)                | 30 (4.8)                   | 1.23 (0.31-4.96)              | 6 (5.9)                 | 47 (4.6)                    | 1.00 (0.25-4.05)              |
| <b>Gestational age, weeks</b> |                        |                            |                               |                         |                             |                               |
| <b>≤ 35</b>                   | 2 (3.2)                | 12 (1.9)                   | 1.35 (0.18-9.93)              | 5 (5.0)                 | 35 (3.5)                    | 1.41 (0.32-6.27)              |
| <b>≥36</b>                    | 60 (96.8)              | 606 (98.1)                 | 1                             | 96 (95.1)               | 980 (96.5)                  | 1                             |
| <b>Apgar score</b>            |                        |                            |                               |                         |                             |                               |

|                            |           |            |                  |           |            |                   |
|----------------------------|-----------|------------|------------------|-----------|------------|-------------------|
| ≥7                         | 57 (91.9) | 583 (94.0) | 1                | 97 (95.1) | 959 (94.2) | 1                 |
| ≤6                         | 5 (8.1)   | 37 (6.0)   | 1.28 (0.46-3.50) | 5 (4.9)   | 59 (5.8)   | 0.73 (0.27-2.00)  |
| <b>Maternal age, years</b> |           |            |                  |           |            |                   |
| < 25                       | 5 (8.7)   | 54 (8.7)   | 0.86 (0.30-2.45) | 17 (16.7) | 142 (13.9) | 1.00 (0.55-1.85)  |
| 25-29                      | 19 (30.7) | 178 (28.7) | 1                | 45 (44.1) | 369 (36.2) | 1                 |
| 30-34                      | 23 (37.1) | 245 (39.5) | 0.99 (0.51-1.91) | 27 (26.5) | 341 (33.4) | 0.68 (0.40- 1.14) |
| 35-39                      | 11 (17.7) | 124 (20.0) | 0.95 (0.42-2.14) | 11 (10.8) | 149 (14.6) | 0.62 (0.30-1.28)  |
| ≥ 40                       | 4 (6.5)   | 19 (3.1)   | 2.43 (0.70-8.36) | 2 (2.0)   | 19 (1.9)   | 0.98 (0.22-4.46)  |
| <b>Maternal education</b>  |           |            |                  |           |            |                   |
| University                 | 6 (9.7)   | 105 (17.1) | 0.63 (0.24-1.68) | 10 (9.8)  | 91 (8.9)   | 1.40 (0.65-3.04)  |
| High school                | 36 (58.1) | 290 (47.1) | 1.37 (0.77-2.44) | 50 (49.3) | 475 (46.7) | 1.15 (0.74-1.81)  |
| Primary/middle school      | 20 (35.3) | 221 (35.9) | 1                | 42 (41.8) | 452 (44.4) | 1                 |

†Age at diagnosis <10 years

‡ Age at diagnosis 10-17 years

Fully adjusted: sex, year of birth, season of birth; having older siblings; number of births; birth weight; gestational age; Apgar scores at 1 minute; maternal age; and mother's formal education at the moment of birth.

**Table S2** Risk of perinatal characteristics in the development of Crohn's disease and UC.

| Characteristics        | Crohn's Disease           |                               |                  | Ulcerative Colitis        |                               |                               |
|------------------------|---------------------------|-------------------------------|------------------|---------------------------|-------------------------------|-------------------------------|
|                        | Cases<br>(n=83,<br>n (%)) | Controls<br>(n=830),<br>n (%) | Adj2 OR (95% CI) | Cases<br>(n=63,<br>n (%)) | Controls<br>(n=630),<br>n (%) | Fully adjusted OR (95%<br>CI) |
| <b>Season of birth</b> |                           |                               |                  |                           |                               |                               |
| May-September          | 35 (42.17)                | 338 (40.7)                    | 1.14 (0.71-1.82) | 31 (49.21)                | 282 (44.8)                    | 1.31 (0.77-2.22)              |
| October-April          | 48 (57.83)                | 492 (59.3)                    | 1                | 32 (50.79)                | 348 (55.2)                    | 1                             |
| <b>Siblings</b>        |                           |                               |                  |                           |                               |                               |
| No                     | 45 (54.22)                | 458 (55.2)                    | 1.86 (0.52-1.40) | 41 (65.08)                | 324 (51.4)                    | 1.79 (0.99-3.22)              |
| Yes                    | 38 (45.78)                | 372 (44.8)                    | 1                | 22 (34.92)                | 306 (48.6)                    | 1                             |
| <b>Multiple births</b> |                           |                               |                  |                           |                               |                               |
| 1                      | 79 (95.18)                | 818 (98.5)                    | 1                | 79 (95.18)                | 612 (97.1)                    | 1                             |
| ≥2                     | 4 (4.82)                  | 12 (1.5)                      | 2.18 (0.51-9.32) | 1 (1.59)                  | 18 (2.9)                      | 1.58 (0.18-13.95)             |
| <b>Birth weight</b>    |                           |                               |                  |                           |                               |                               |
| ≥2500                  | 74 (89.32)                | 795 (95.8)                    | 1                | 63 (100.00)               | 595 (94.4)                    | 1                             |
| <2500                  | 9 (10.84)                 | 35 (4.2)                      | 2.01 (0.66-6.18) | 0                         | 35 (5.6)                      | -                             |
| <b>Gestational age</b> |                           |                               |                  |                           |                               |                               |
| ≤35                    | 6 (7.23)                  | 19 (2.3)                      | 1.53 (0.37-6.42) | 0                         | 23 (3.7)                      | -                             |
| ≥36                    | 77 (92.77)                | 806 (97.7)                    | 1                | 62 (100.00)               | 605 (96.3)                    | 1                             |

|                           |            |            |                  |            |            |                  |
|---------------------------|------------|------------|------------------|------------|------------|------------------|
| <b>Apgar</b>              |            |            |                  |            |            |                  |
| ≥7                        | 77 (92.77) | 792 (95.4) | 1                | 60 (95.24) | 582 (92.7) | 1                |
| ≤ 6                       | 6 (7.23)   | 38 (4.6)   | 1.33 (0.52-3.38) | 3 (4.76)   | 46 (7.3)   | 0.80 (0.22-2.86) |
| <b>Maternal age</b>       |            |            |                  |            |            |                  |
| < 25                      | 11 (13.25) | 95 (11.5)  | 1.08 (0.52-2.25) | 7 (11.11)  | 79 (12.5)  | 0.66 (0.27-1.62) |
| 25-29                     | 33 (39.76) | 281 (33.9) | 1                | 25 (39.68) | 203 (32.2) | 1                |
| 30-34                     | 19 (22.89) | 297 (35.8) | 0.48 (0.26-0.89) | 24 (38.10) | 221 (35.1) | 1.07 (0.57-2.01) |
| 35-39                     | 15 (18.07) | 133 (16.0) | 0.80 (0.39-1.61) | 6 (9.52)   | 114 (18.1) | 0.62 (0.23-1.64) |
| ≥ 40                      | 5 (6.02)   | 24 (2.9)   | 1.46 (0.49-4.35) | 1 (1.59)   | 13 (2.1)   | 1.05 (0.13-8.84) |
| <b>Maternal education</b> |            |            |                  |            |            |                  |
| University                | 11 (13.25) | 106 (12.8) | 1.56 (0.70-3.52) | 4 (6.35)   | 79 (12.5)  | 0.56 (0.18-1.70) |
| High school               | 46 (55.42) | 396 (47.9) | 1.61 (0.94-2.74) | 34 (53.97) | 282 (44.8) | 1.22 (0.70-2.14) |
| Primary/middle school     | 26 (31.33) | 324 (39.2) | 1                | 25 (39.68) | 269 (42.7) | 1                |

Fully adjusted: sex, year of birth, season of birth; having older siblings; number of births; birth weight; gestational age; Apgar scores at 1 minute; maternal age; and mother's formal education at the moment of birth.

**Table S3. Frequency of antibiotic prescriptions stratified by type of active ingredient and antibiotic spectrum, among IBD cases and controls.**

| ANTIBIOTIC ATC CODE (Active ingredient)           | Antibiotic type | Spectrum (broad/narrow) | IBD      |       |     | All per type of antibiotic |
|---------------------------------------------------|-----------------|-------------------------|----------|-------|-----|----------------------------|
|                                                   |                 |                         | Controls | Cases | All |                            |
| J01CA04 (amoxicillin)                             | penicillin      | Broad                   | 278      | 53    | 331 | 399                        |
|                                                   |                 |                         | 44.6     | 42.4  |     |                            |
| J01CR02 (moxicillin and beta-lactamase inhibitor) |                 | Narrow                  | 56       | 12    | 68  |                            |
|                                                   |                 |                         | 9.0      | 9.6   |     |                            |
| J01DA06 (cefuroxime)                              | cephalosporin   | Broad                   | 5        | 0     | 5   |                            |
| 0.8                                               |                 |                         | 0        |       |     |                            |
| J01DA08-DC04 (cefactor)                           |                 | Broad                   | 95       | 30    | 125 |                            |
|                                                   |                 |                         | 15.2     | 24.0  |     |                            |
| J01DA11 (ceftazidime)                             |                 | Broad                   | 5        | 1     | 6   |                            |
|                                                   |                 |                         | 0.8      | 0.8   |     |                            |
| J01DA23 (cefixime)                                |                 | Broad                   | 25       | 0     | 25  |                            |
|                                                   |                 |                         | 4.0      | 0     |     |                            |
| J01DA33 (Cefpodoxime)                             |                 | Broad                   | 1        | 0     | 1   |                            |
|                                                   |                 |                         | 0.2      | 0     |     |                            |
| J01DA39 (ceftibuten)                              |                 | Broad                   | 14       | 1     | 15  |                            |
|                                                   |                 |                         | 2.2      | 0.8   |     |                            |
| J01DA41 (cefprozil)                               |                 | Broad                   | 1        | 0     | 1   |                            |
|                                                   |                 |                         | 0.2      | 0     |     |                            |
| J01DC02 (cefuroxime)                              | Broad           | 1                       | 0        | 1     |     |                            |
|                                                   |                 | 0.2                     | 0        |       |     |                            |
|                                                   |                 |                         |          |       |     |                            |
|                                                   |                 |                         |          |       | 193 |                            |

|                                                    |                       |               |     |     |    |     |
|----------------------------------------------------|-----------------------|---------------|-----|-----|----|-----|
| <b>J01DD08 (cefixime)</b>                          |                       | <b>Broad</b>  | 1   | 0   | 1  |     |
|                                                    |                       |               | 0.2 | 0   |    |     |
| <b>J01DD13 (cefpodoxime)</b>                       |                       | <b>Broad</b>  | 2   | 1   | 3  |     |
|                                                    |                       |               | 0.3 | 0.8 |    |     |
| <b>J01DD14 (Ceftibuten)</b>                        |                       | <b>Broad</b>  | 8   | 2   | 10 |     |
|                                                    |                       |               | 1.3 | 1.6 |    |     |
| <b>J01EA01 (trimethoprim)</b>                      | <b>sulfonamide</b>    | <b>Broad</b>  | 1   | 0   | 1  |     |
|                                                    |                       |               | 0.2 | 0   |    |     |
| <b>J01EE01 (Sulfamethoxazole and trimethoprim)</b> |                       | <b>Broad</b>  | 2   | 1   | 3  | 4   |
|                                                    |                       |               | 0.3 | 0.8 |    |     |
| <b>J01FA01 (erythromycin)</b>                      | <b>macrolide</b>      | <b>Narrow</b> | 5   | 0   | 5  |     |
|                                                    |                       |               | 0.8 | 0   |    |     |
| <b>J01FA06 (roxithromycin)</b>                     |                       | <b>Narrow</b> | 1   | 0   | 1  |     |
|                                                    |                       |               | 0.2 | 0   |    |     |
| <b>J01FA07 (josamycin)</b>                         |                       | <b>Broad</b>  | 17  | 1   | 18 |     |
|                                                    |                       |               | 2.7 | 0.8 |    |     |
| <b>J01FA09 (clarithromycin)</b>                    |                       | <b>Narrow</b> | 62  | 4   | 66 |     |
|                                                    |                       |               | 9.9 | 3.2 |    |     |
| <b>J01FA10 (azithromycin)</b>                      |                       | <b>Narrow</b> | 35  | 5   | 40 |     |
|                                                    |                       |               | 5.6 | 4   |    |     |
| <b>J01FA11 (miocamycin)</b>                        |                       | <b>Narrow</b> | 3   | 1   | 4  |     |
|                                                    |                       |               | 0.5 | 0.8 |    |     |
| <b>J01FA12 (rokitamycin)</b>                       |                       | <b>Narrow</b> | 3   | 0   | 3  | 137 |
|                                                    |                       |               | 0.5 | 0   |    |     |
| <b>J01GB03 (gentamicin)</b>                        | <b>aminoglycoside</b> | <b>Broad</b>  | 0   | 10  | 10 |     |
|                                                    |                       |               | 0   | 8   |    |     |
| <b>J01GB07 (netilmicin)</b>                        |                       | <b>Broad</b>  | 1   | 3   | 4  | 14  |
|                                                    |                       |               | 0.2 | 2.4 |    |     |
| <b>J01MA01 (ofloxacin)</b>                         | <b>quinolone</b>      | <b>Broad</b>  | 1   | 0   | 1  |     |
|                                                    |                       |               | 0.2 | 0   |    |     |
|                                                    |                       |               |     |     |    | 1   |

|                             |              |              |     |     |     |   |
|-----------------------------|--------------|--------------|-----|-----|-----|---|
| <b>J01XX01 (fosfomycin)</b> | <b>other</b> | <b>Broad</b> | 1   | 0   | 1   | 1 |
|                             |              |              | 0.2 | 0   |     |   |
| <b>Total</b>                |              |              | 624 | 125 | 749 |   |

**Table S4** Risk of developing VEO-IBD (1-5 years) after antibiotic exposure in the first 6 and 12 months of life.

|                                                               | VEO-IBD (n = 19) n (%) | Controls (n = 190), n (%) | Adj 2 OR (95% CI)          |
|---------------------------------------------------------------|------------------------|---------------------------|----------------------------|
| <b>Antibiotic prescription in the first 6 months of life</b>  |                        |                           |                            |
| No                                                            | 11 (57.9)              | 155 (81.6)                | 1                          |
| Yes                                                           | 8 (42.1)               | 35 (18.4)                 | <b>4.56</b> (1.48-14.02)   |
| 1†                                                            | 3 (15.8)               | 25 (13.2)                 | 2.02 (0.49-8.40)           |
| 2-3†                                                          | 3 (15.8)               | 9 (4.7)                   | 9.32 (1.62-53.60)          |
| ≥4†                                                           | 2 (10.5)               | 1 (0.5)                   | <b>25.63</b> (1.34-490.46) |
| <b>Antibiotic prescription in the first 12 months of life</b> |                        |                           |                            |
| No                                                            | 5 (26.3)               | 108 (56.8)                | 1                          |
| Yes                                                           | 14 (73.7)              | 82 (43.2)                 | <b>4.54</b> (1.47-14.02)   |
| 1†                                                            | 5 (26.3)               | 45 (23.7)                 | 3.42 (0.77-15.27)          |
| 2-3†                                                          | 3 (15.8)               | 28 (14.7)                 | 2.30 (0.47-11.18)          |
| ≥4†                                                           | 6 (31.6)               | 9 (4.7)                   | <b>87.07</b> (8.43-899.78) |

†Reference group: not exposed to antibiotics

Adj2: sex, year of birth, season of birth; having older siblings; number of births; birth weight; gestational age; Apgar scores at 1 minute; maternal age; and mother's formal education at the moment of birth
